# Supplementary material for: A tuneable minimal cell membrane reveals that two lipid species suffice for life
Source: PubMed Central journal article supplement (PMC11549477; doi:10.1038/s41467-024-53975-y), 2024-11-08
Supplement: 41467_2024_53975_MOESM2_ESM.pdf [file 41467_2024_53975_MOESM2_ESM.pdf]

## Description of Additional Supplementary Files

**Supplementary Data 1.** Names and concentrations of lipids used in the “defined diets” described in this experiment.

**Supplementary Data 2.** Defined diets fed to *M. mycooides* and JCVI-Syn3A, as well as the number of surviving replicates on each diet and their mean growth rate.

**Supplementary Data 3.** Lipidomic mass-spec data shown in the paper on a replicate level.
